# Supplementary material for: Genetic risk, incident stroke, and the benefits of adhering to a healthy lifestyle: cohort study of 306 473 UK Biobank participants
Source: PubMed Central journal article supplement (PMC6199557; doi:10.1136/bmj.k4168), 2018-10-24
Supplement: rutl044985.wt1.pdf [file rutl044985.wt1.pdf]

| SNP_ID      | RISK_ALLELE | BETA    | PVALUE   |
|-------------|-------------|---------|----------|
| rs1052053   | A           | 0.0675  | 2.25E-12 |
| rs1070252   | T           | 0.0662  | 1.77E-06 |
| rs10774624  | A           | -0.0654 | 4.04E-12 |
| rs10883926  | A           | 0.0503  | 8.15E-08 |
| rs10937513  | A           | 0.0989  | 5.02E-07 |
| rs11045896  | A           | 0.0487  | 7.44E-06 |
| rs11066283  | A           | -0.0692 | 2.36E-11 |
| rs11242678  | T           | 0.0643  | 8.71E-10 |
| rs114591768 | T           | 0.3355  | 2.43E-06 |
| rs117426542 | A           | 0.1487  | 1.56E-06 |
| rs11952498  | T           | 0.0431  | 5.69E-06 |
| rs11957829  | A           | 0.0616  | 1.51E-06 |
| rs12326831  | A           | -0.0857 | 7.93E-06 |
| rs12361415  | T           | 0.0458  | 9.53E-06 |
| rs12445022  | A           | 0.052   | 1.03E-07 |
| rs12562305  | A           | 0.0882  | 2.60E-06 |
| rs12630390  | A           | 0.1184  | 3.72E-06 |
| rs13312215  | A           | -0.1103 | 9.26E-06 |
| rs143268049 | T           | -0.191  | 2.65E-07 |
| rs147076266 | A           | -0.2051 | 3.56E-06 |
| rs147410905 | A           | -0.1325 | 1.89E-06 |
| rs147861947 | A           | 0.1342  | 4.51E-06 |
| rs148159238 | T           | 0.1486  | 8.86E-06 |
| rs149520112 | T           | 0.1794  | 8.79E-06 |
| rs1495900   | A           | -0.0479 | 5.97E-06 |
| rs151080514 | T           | 0.2419  | 5.58E-06 |
| rs1537375   | T           | -0.0519 | 1.24E-08 |
| rs1537407   | T           | -0.0662 | 4.48E-07 |
| rs1549758   | T           | 0.0532  | 3.11E-07 |
| rs1563788   | T           | 0.0449  | 6.14E-06 |
| rs159963    | A           | 0.0424  | 8.43E-06 |
| rs17035646  | A           | 0.0522  | 6.12E-08 |
| rs187555384 | A           | 0.0567  | 9.09E-06 |
| rs2060213   | T           | -0.0523 | 1.28E-06 |
| rs2066864   | A           | 0.0562  | 1.29E-07 |
| rs2107595   | A           | 0.0803  | 3.59E-11 |
| rs2284665   | T           | -0.0602 | 5.99E-08 |
| rs2455134   | A           | -0.0564 | 8.58E-06 |
| rs2585193   | A           | 0.0504  | 2.45E-07 |
| rs2634074   | A           | -0.084  | 6.56E-14 |
| rs2978551   | T           | 0.0446  | 3.39E-06 |
| rs34212978  | T           | -0.0687 | 5.79E-06 |
| rs34416434  | T           | -0.1155 | 1.39E-06 |
| rs35046086  | A           | 0.2006  | 7.19E-06 |
| rs35276016  | T           | 0.0984  | 9.31E-08 |

|            |   |         |          |
|------------|---|---------|----------|
| rs36053597 | T | 0.061   | 4.55E-07 |
| rs4140660  | T | 0.0641  | 5.34E-06 |
| rs4151702  | C | -0.0551 | 2.63E-06 |
| rs42039    | T | -0.0574 | 1.65E-07 |
| rs4556502  | A | 0.1383  | 1.23E-06 |
| rs475937   | A | 0.0757  | 2.92E-08 |
| rs4886564  | T | -0.0653 | 2.37E-06 |
| rs4903725  | T | 0.0586  | 9.27E-06 |
| rs4942561  | T | 0.064   | 2.05E-09 |
| rs57269940 | T | 0.0499  | 3.85E-06 |
| rs59844791 | A | -0.0633 | 8.15E-06 |
| rs635634   | T | 0.0685  | 6.03E-08 |
| rs650724   | A | -0.0793 | 2.17E-06 |
| rs6544653  | T | -0.0451 | 8.84E-06 |
| rs6838973  | T | -0.0421 | 6.48E-06 |
| rs6872625  | T | 0.051   | 4.21E-06 |
| rs7124178  | T | -0.0524 | 8.98E-07 |
| rs7200604  | T | 0.0533  | 8.76E-06 |
| rs7219031  | A | 0.0596  | 2.59E-07 |
| rs72699046 | C | 0.0897  | 1.53E-07 |
| rs72889922 | A | 0.2504  | 2.91E-06 |
| rs7294375  | T | -0.053  | 3.33E-07 |
| rs7314740  | A | -0.0859 | 7.00E-06 |
| rs7435890  | A | 0.057   | 8.71E-08 |
| rs74808730 | A | -0.0828 | 8.69E-06 |
| rs7488386  | A | -0.0412 | 9.15E-06 |
| rs74976226 | T | -0.1435 | 9.66E-06 |
| rs7538546  | T | 0.0862  | 6.29E-06 |
| rs7549874  | T | 0.0495  | 2.07E-06 |
| rs75630045 | A | 0.2002  | 3.29E-06 |
| rs76893867 | C | 0.0506  | 8.07E-06 |
| rs77559139 | A | 0.1371  | 5.27E-07 |
| rs7917880  | A | -0.0427 | 5.26E-06 |
| rs79280766 | A | 0.1434  | 2.20E-06 |
| rs79332111 | T | -0.0661 | 4.85E-06 |
| rs79485249 | A | -0.1021 | 3.11E-07 |
| rs8103309  | T | 0.0522  | 3.70E-07 |
| rs879324   | A | 0.0567  | 1.90E-06 |
| rs9386182  | A | -0.0467 | 4.22E-06 |
| rs9502286  | A | 0.1064  | 6.92E-06 |
| rs9521635  | T | -0.0423 | 9.36E-06 |
| rs9613666  | T | 0.0426  | 6.80E-06 |
| rs9668073  | T | 0.0431  | 3.97E-06 |
| rs9852938  | A | 0.0586  | 9.41E-06 |
| rs9936039  | A | -0.0561 | 1.98E-07 |
