# Supplementary material for: Genetic risk, incident stroke, and the benefits of adhering to a healthy lifestyle: cohort study of 306 473 UK Biobank participants
Source: PubMed Central journal article supplement (PMC6199557; doi:10.1136/bmj.k4168), 2018-10-24
Supplement: rutl044985.ww1.pdf [file rutl044985.ww1.pdf]

## **SUPPLEMENTAL MATERIALS**

### **Genetic risk, incident stroke, and the benefits of adhering to a healthy lifestyle: follow-up of 306,473 UK Biobank participants**

Loes CA Rutten-Jacobs, senior postdoctoral researcher<sup>1,2</sup>; Susanna C Larsson, associate professor<sup>3</sup>; Rainer Malik, postdoctoral fellow<sup>4</sup>; Kristiina Rannikmäe, senior clinical research fellow<sup>5,6</sup>; MEGASTROKE consortium; International Stroke Genetics Consortium (ISGC); Cathie L Sudlow, professor<sup>5,6,7</sup>; Martin Dichgans, professor<sup>4,8,9</sup>; Hugh S Markus, professor<sup>2</sup>; Matthew Traylor, senior research associate<sup>2</sup>

1 German Center for Neurodegenerative diseases (DZNE), Population Health Sciences, Bonn, Germany

2 Department of Clinical Neurosciences, Stroke Research Group, University of Cambridge, UK

3 Unit of Nutritional Epidemiology, Institute of Environmental Medicine, Karolinska Institutet, Stockholm, Sweden

4 Institute for Stroke and Dementia Research (ISD), University Hospital, LMU Munich, Munich, Germany

5 Centre for Medical Informatics, Usher Institute of Population Health Sciences and Informatics, University of Edinburgh

6 Centre for Clinical Brain Sciences, University of Edinburgh, UK

7 Institute of Genetics and Molecular Medicine, University of Edinburgh, UK

8 Munich Cluster for Systems Neurology (SyNergy), Munich, Germany

9 German Center for Neurodegenerative Diseases (DZNE), Munich, Germany

## Content

**Text S1** Diet score extended information

**Text S2** MEGASTROKE extended information and acknowledgements

**Table S1** Dietary questions used in the current analysis

**Table S2** UK Biobank data fields used to derive the outcome variables and follow-up duration

**Table S4** Impact of cardiometabolic risk factors on the association of the genetic risk score with incident stroke

**Table S5** Association of genetic risk and lifestyle with incident stroke

**Table S6** Association of lifestyle with incident stroke in genetic risk strata

**Table S7** Association of genetic risk with incident stroke and incident ischaemic stroke using Cox proportional hazards regression and incident stroke using competing risk regression (Fine and Gray)

**Table S8** Association of lifestyle with incident stroke and incident ischaemic stroke using Cox proportional hazards regression and incident stroke using competing risk regression (Fine and Gray)

**Table S9** Association of lifestyle and genetic risk score with incident stroke and incident ischaemic stroke using Cox proportional hazards regression and incident stroke using competing risk regression (Fine and Gray)

**Table S10** Relative and absolute risk of incident stroke according to genetic and lifestyle profiles including double weighting for smoking

**Figure S1** Association of genetic risk score at varying significance thresholds with incident stroke

**Figure S2** Distribution of all stroke genetic risk score derived from MEGASTROKE  $p < 1 \times 10^{-5}$

**Figure S3** Distribution of genetic risk across lifestyle categories

**Figure S4** Standardized risk of incident stroke according to genetic risk and lifestyle

**Figure S5** Standardized risk of incident stroke according to genetic risk stratified by sex

**Figure S6** Standardized risk of incident stroke according to lifestyle profile stratified by sex

**Supplemental References**

## **Text S1 Diet score extended information**

During the baseline assessment all UK Biobank participants completed an extensive questionnaire that included dietary habits (“Touchscreen Questionnaire”, available from <http://www.ukbiobank.ac.uk/resources/>). Supplemental table S1 lists the questions corresponding to the data used in the current analysis.

Healthy diet patterns were adapted from the American Heart Association Guidelines<sup>1</sup> and defined as follows:

Total fruit and vegetable intake:  $\geq 4.5$  pieces or servings a week. 3 Tablespoons of vegetables were considered one serving

Total fish intake:  $\geq 2$  per week

Processed and red meat intake: 2 or fewer times intake of processed meat per week & 5 or fewer times intake of red meat per week

The healthy diet score was dichotomised as 1 = at least two of the healthy food items, 0 = fewer than 2 of the healthy food items.

## **Text S2 MEGASTROKE extended information and acknowledgements**

Stroke genome-wide association summary statistics were obtained from the MEGASTROKE study.<sup>2</sup> In this study ~8 million single nucleotide polymorphisms (SNPs) and InDels with minor allele frequency (MAF) > 0.01 were tested for association in up to 67,162 stroke cases and 454,450 controls. Participants were drawn from 29 studies, that were genotyped with GWAS arrays and imputed to 1000 Genomes phase 1v3 or similar. Two main analysis were performed, one of European participants only (40,585 cases; 406,111 controls) and a second transethnic analysis which involved participants of European, East Asian (17,369; 28,195), African (5,541; 15,154), South Asian (2,437; 6,707), mixed Asian (365; 333), and Latin American (865; 692) ancestry.

In the current analysis we only used the results of the European-only analysis.

### **MEGASTROKE CONSORTIUM**

Rainer Malik<sup>1</sup>, Ganesh Chauhan<sup>2</sup>, Matthew Traylor<sup>3</sup>, Muralidharan Sargurupremraj<sup>4,5</sup>, Yukinori Okada<sup>6,7,8</sup>, Aniket Mishra<sup>4,5</sup>, Loes Rutten-Jacobs<sup>3</sup>, Anne-Katrin Giese<sup>9</sup>, Sander W van der Laan<sup>10</sup>, Solveig Gretarsdottir<sup>11</sup>, Christopher D Anderson<sup>12,13,14,14</sup>, Michael Chong<sup>15</sup>, Hieab HH Adams<sup>16,17</sup>, Tetsuro Ago<sup>18</sup>, Peter Almgren<sup>19</sup>, Philippe Amouyel<sup>20,21</sup>, Hakan Ay<sup>22,13</sup>, Traci M Bartz<sup>23</sup>, Oscar R Benavente<sup>24</sup>, Steve Bevan<sup>25</sup>, Giorgio B Boncoraglio<sup>26</sup>, Robert D Brown, Jr.<sup>27</sup>, Adam S Butterworth<sup>28,29</sup>, Caty Carrera<sup>30,31</sup>, Cara L Carty<sup>32,33</sup>, Daniel I Chasman<sup>34,35</sup>, Wei-Min Chen<sup>36</sup>, John W Cole<sup>37</sup>, Adolfo Correa<sup>38</sup>, Ioana Cotlarciuc<sup>39</sup>, Carlos Cruchaga<sup>40,41</sup>, John Danesh<sup>28,42,43,44</sup>, Paul IW de Bakker<sup>45,46</sup>, Anita L DeStefano<sup>47,48</sup>, Marcel den Hoed<sup>49</sup>, Qing Duan<sup>50</sup>, Stefan T Engelter<sup>51,52</sup>, Guido J Falcone<sup>53,54</sup>, Rebecca F Gottesman<sup>55</sup>, Raji P Grewal<sup>56</sup>, Vilmundur Gudnason<sup>57,58</sup>, Stefan Gustafsson<sup>59</sup>, Jeffrey Haessler<sup>60</sup>, Tamara B Harris<sup>61</sup>, Ahamad Hassan<sup>62</sup>, Aki S Havulinna<sup>63,64</sup>, Susan R Heckbert<sup>65</sup>, Elizabeth G Holliday<sup>66,67</sup>, George Howard<sup>68</sup>, Fang-Chi Hsu<sup>69</sup>, Hyacinth I Hyacinth<sup>70</sup>, M Arfan Ikram<sup>16</sup>, Erik Ingelsson<sup>71,72</sup>, Marguerite R Irvin<sup>73</sup>, Xueqiu Jian<sup>74</sup>, Jordi Jiménez-Conde<sup>75</sup>, Julie A Johnson<sup>76,77</sup>, J Wouter Jukema<sup>78</sup>, Masahiro Kanai<sup>6,7,79</sup>, Keith L Keene<sup>80,81</sup>, Brett M Kissela<sup>82</sup>, Dawn O Kleindorfer<sup>82</sup>, Charles Kooperberg<sup>60</sup>, Michiaki Kubo<sup>83</sup>, Leslie A Lange<sup>84</sup>, Carl D Langefeld<sup>85</sup>, Claudia Langenberg<sup>86</sup>, Lenore J Launer<sup>87</sup>, Jin-Moo Lee<sup>88</sup>, Robin Lemmens<sup>89,90</sup>, Didier Leys<sup>91</sup>, Cathryn M Lewis<sup>92,93</sup>, Wei-Yu Lin<sup>28,94</sup>, Arne G Lindgren<sup>95,96</sup>, Erik Lorentzen<sup>97</sup>, Patrik K Magnusson<sup>98</sup>, Jane Maguire<sup>99</sup>, Ani Manichaikul<sup>36</sup>, Patrick F McArdle<sup>100</sup>, James F Meschia<sup>101</sup>, Braxton D Mitchell<sup>100,102</sup>, Thomas H

Mosley <sup>103,104</sup>, Michael A Nalls <sup>105,106</sup>, Toshiharu Ninomiya <sup>107</sup>, Martin J O'Donnell <sup>15,108</sup>, Bruce M Psaty <sup>109,110,111,112</sup>, Sara L Pulit <sup>113,45</sup>, Kristiina Rannikmäe <sup>114,115</sup>, Alexander P Reiner <sup>65,116</sup>, Kathryn M Rexrode <sup>117</sup>, Kenneth Rice <sup>118</sup>, Stephen S Rich <sup>36</sup>, Paul M Ridker <sup>34,35</sup>, Natalia S Rost <sup>9,13</sup>, Peter M Rothwell <sup>119</sup>, Jerome I Rotter <sup>120,121</sup>, Tatjana Rundek <sup>122</sup>, Ralph L Sacco <sup>122</sup>, Saori Sakaue <sup>7,123</sup>, Michele M Sale <sup>124</sup>, Veikko Salomaa <sup>63</sup>, Bishwa R Sapkota <sup>125</sup>, Reinhold Schmidt <sup>126</sup>, Carsten O Schmidt <sup>127</sup>, Ulf Schminke <sup>128</sup>, Pankaj Sharma <sup>39</sup>, Agnieszka Slowik <sup>129</sup>, Cathie LM Sudlow <sup>114,115</sup>, Christian Tanislav <sup>130</sup>, Turgut Tatlisumak <sup>131,132</sup>, Kent D Taylor <sup>120,121</sup>, Vincent NS Thijs <sup>133,134</sup>, Gudmar Thorleifsson <sup>11</sup>, Unnur Thorsteinsdottir <sup>11</sup>, Steffen Tiedt <sup>1</sup>, Stella Trompet <sup>135</sup>, Christophe Tzourio <sup>5,136,137</sup>, Cornelia M van Duijn <sup>138,139</sup>, Matthew Walters <sup>140</sup>, Nicholas J Wareham <sup>86</sup>, Sylvia Wassertheil-Smoller <sup>141</sup>, James G Wilson <sup>142</sup>, Kerri L Wiggins <sup>109</sup>, Qiong Yang <sup>47</sup>, Salim Yusuf <sup>15</sup>, Najaf Amin <sup>16</sup>, Hugo S Aparicio <sup>185,48</sup>, Donna K Arnett <sup>186</sup>, John Attia <sup>187</sup>, Alexa S Beiser <sup>47,48</sup>, Claudine Berr <sup>188</sup>, Julie E Buring <sup>34,35</sup>, Mariana Bustamante <sup>189</sup>, Valeria Caso <sup>190</sup>, Yu-Ching Cheng <sup>191</sup>, Seung Hoan Choi <sup>192,48</sup>, Ayesha Chowhan <sup>185,48</sup>, Natalia Cullell <sup>31</sup>, Jean-François Dartigues <sup>193,194</sup>, Hossein Delavaran <sup>95,96</sup>, Pilar Delgado <sup>195</sup>, Marcus Dörr <sup>196,197</sup>, Gunnar Engström <sup>19</sup>, Ian Ford <sup>198</sup>, Wander S Gurpreet <sup>199</sup>, Anders Hamsten <sup>200,201</sup>, Laura Heitsch <sup>202</sup>, Atsushi Hozawa <sup>203</sup>, Laura Ibanez <sup>204</sup>, Andreea Ilinca <sup>95,96</sup>, Martin Ingelsson <sup>205</sup>, Motoki Iwasaki <sup>206</sup>, Rebecca D Jackson <sup>207</sup>, Katarina Jood <sup>208</sup>, Pekka Jousilahti <sup>63</sup>, Sara Kaffashian <sup>4,5</sup>, Lalit Kalra <sup>209</sup>, Masahiro Kamouchi <sup>210</sup>, Takanari Kitazono <sup>211</sup>, Olafur Kjartansson <sup>212</sup>, Manja Kloss <sup>213</sup>, Peter J Koudstaal <sup>214</sup>, Jerzy Krupinski <sup>215</sup>, Daniel L Labovitz <sup>216</sup>, Cathy C Laurie <sup>118</sup>, Christopher R Levi <sup>217</sup>, Linxin Li <sup>218</sup>, Lars Lind <sup>219</sup>, Cecilia M Lindgren <sup>220,221</sup>, Vasileios Lioutas <sup>222,48</sup>, Yong Mei Liu <sup>223</sup>, Oscar L Lopez <sup>224</sup>, Hirata Makoto <sup>225</sup>, Nicolas Martinez-Majander <sup>172</sup>, Koichi Matsuda <sup>225</sup>, Naoko Minegishi <sup>203</sup>, Joan Montaner <sup>226</sup>, Andrew P Morris <sup>227,228</sup>, Elena Muñio <sup>31</sup>, Martina Müller-Nurasyid <sup>229,230,231</sup>, Bo Norrving <sup>95,96</sup>, Soichi Ogishima <sup>203</sup>, Eugenio A Parati <sup>232</sup>, Leema Reddy Peddareddygar <sup>56</sup>, Nancy L Pedersen <sup>98,233</sup>, Joanna Pera <sup>129</sup>, Markus Perola <sup>63,234</sup>, Alessandro Pezzini <sup>235</sup>, Silvana Pileggi <sup>236</sup>, Raquel Rabionet <sup>237</sup>, Iolanda Riba-Llena <sup>30</sup>, Marta Ribasés <sup>238</sup>, Jose R Romero <sup>185,48</sup>, Jaime Roquer <sup>239,240</sup>, Anthony G Rudd <sup>241,242</sup>, Antti-Pekka Sarin <sup>243,244</sup>, Ralhan Sarju <sup>199</sup>, Chloe Sarnowski <sup>47,48</sup>, Makoto Sasaki <sup>245</sup>, Claudia L Satizabal <sup>185,48</sup>, Mamoru Satoh <sup>245</sup>, Naveed Sattar <sup>246</sup>, Norie Sawada <sup>206</sup>, Gerli Sibolt <sup>172</sup>, Ásgeir Sigurdsson <sup>247</sup>, Albert Smith <sup>248</sup>, Kenji Sobue <sup>245</sup>, Carolina Soriano-Tárraga <sup>240</sup>, Tara Stanne <sup>249</sup>, O Colin Stine <sup>250</sup>, David J Stott <sup>251</sup>, Konstantin Strauch <sup>229,252</sup>, Takako Takai <sup>203</sup>, Hideo Tanaka <sup>253,254</sup>, Kozo Tanno <sup>245</sup>, Alexander Teumer <sup>255</sup>, Liisa Tomppo <sup>172</sup>, Nuria P Torres-Aguila <sup>31</sup>, Emmanuel Touze <sup>256,257</sup>, Shoichiro Tsugane <sup>206</sup>, Andre G Uitterlinden <sup>258</sup>, Einar M Valdimarsson <sup>259</sup>, Sven J van der Lee <sup>16</sup>, Henry Völzke <sup>255</sup>, Kenji Wakai <sup>253</sup>, David Weir <sup>260</sup>, Stephen R Williams <sup>261</sup>, Charles DA Wolfe <sup>241,242</sup>, Quenna Wong <sup>118</sup>, Huichun Xu <sup>191</sup>, Taiki Yamaji <sup>206</sup>, Dharambir K Sanghera <sup>125,169,170</sup>, Olle Melander <sup>19</sup>, Christina Jern <sup>171</sup>, Daniel Strbian <sup>172,173</sup>, Israel Fernandez-Cadenas <sup>31,30</sup>, W T Longstreth, Jr <sup>174,65</sup>, Arndt Rolfs <sup>175</sup>, Jun Hata <sup>107</sup>, Daniel Woo <sup>82</sup>, Jonathan Rosand <sup>12,13,14</sup>, Guillaume Pare <sup>15</sup>, Jemma C Hopewell <sup>176</sup>, Danish Saleheen <sup>177</sup>, Kari Stefansson <sup>11,178</sup>, Bradford B Worrall <sup>179</sup>, Steven J Kittner <sup>37</sup>, Sudha Seshadri <sup>180,48</sup>, Myriam Fornage <sup>74,181</sup>, Hugh S Markus <sup>3</sup>, Joanna MM Howson <sup>28</sup>, Yoichiro Kamatani <sup>6,182</sup>, Stephanie Debette <sup>4,5</sup>, Martin Dichgans <sup>1,183,184</sup>

1 Institute for Stroke and Dementia Research (ISD), University Hospital, LMU Munich, Munich, Germany

2 Centre for Brain Research, Indian Institute of Science, Bangalore, India

3 Stroke Research Group, Division of Clinical Neurosciences, University of Cambridge, UK

4 INSERM U1219 Bordeaux Population Health Research Center, Bordeaux, France

- 5 University of Bordeaux, Bordeaux, France
- 6 Laboratory for Statistical Analysis, RIKEN Center for Integrative Medical Sciences, Yokohama, Japan
- 7 Department of Statistical Genetics, Osaka University Graduate School of Medicine, Osaka, Japan
- 8 Laboratory of Statistical Immunology, Immunology Frontier Research Center (WPI-IFReC), Osaka University, Suita, Japan.
- 9 Department of Neurology, Massachusetts General Hospital, Harvard Medical School, Boston, MA, USA
- 10 Laboratory of Experimental Cardiology, Division of Heart and Lungs, University Medical Center Utrecht, University of Utrecht, Utrecht, Netherlands
- 11 deCODE genetics/AMGEN inc, Reykjavik, Iceland
- 12 Center for Genomic Medicine, Massachusetts General Hospital (MGH), Boston, MA, USA
- 13 J. Philip Kistler Stroke Research Center, Department of Neurology, MGH, Boston, MA, USA
- 14 Program in Medical and Population Genetics, Broad Institute, Cambridge, MA, USA
- 15 Population Health Research Institute, McMaster University, Hamilton, Canada
- 16 Department of Epidemiology, Erasmus University Medical Center, Rotterdam, Netherlands
- 17 Department of Radiology and Nuclear Medicine, Erasmus University Medical Center, Rotterdam, Netherlands
- 18 Department of Medicine and Clinical Science, Graduate School of Medical Sciences, Kyushu University, Fukuoka, Japan
- 19 Department of Clinical Sciences, Lund University, Malmö, Sweden
- 20 Univ. Lille, Inserm, Institut Pasteur de Lille, LabEx DISTALZ-UMR1167, Risk factors and molecular determinants of aging-related diseases, F-59000 Lille, France
- 21 Centre Hosp. Univ Lille, Epidemiology and Public Health Department, F-59000 Lille, France
- 22 AA Martinos Center for Biomedical Imaging, Department of Radiology, Massachusetts General Hospital, Harvard Medical School, Boston, MA, USA
- 23 Cardiovascular Health Research Unit, Departments of Biostatistics and Medicine, University of Washington, Seattle, WA, USA
- 24 Division of Neurology, Faculty of Medicine, Brain Research Center, University of British Columbia, Vancouver, Canada
- 25 School of Life Science, University of Lincoln, Lincoln, UK
- 26 Department of Cerebrovascular Diseases, Fondazione IRCCS Istituto Neurologico "Carlo Besta", Milano, Italy
- 27 Department of Neurology, Mayo Clinic Rochester, Rochester, MN, USA
- 28 MRC/BHF Cardiovascular Epidemiology Unit, Department of Public Health and Primary Care, University of Cambridge, Cambridge, UK
- 29 The National Institute for Health Research Blood and Transplant Research Unit in Donor Health and Genomics, University of Cambridge, UK
- 30 Neurovascular Research Laboratory, Vall d'Hebron Institut of Research, Neurology and Medicine Departments-Universitat Autònoma de Barcelona, Vall d'Hebrón Hospital, Barcelona, Spain
- 31 Stroke Pharmacogenomics and Genetics, Fundacio Docència i Recerca MutuaTerrassa, Terrassa, Spain
- 32 Children's Research Institute, Children's National Medical Center, Washington, DC, USA
- 33 Center for Translational Science, George Washington University, Washington, DC, USA

34 Division of Preventive Medicine, Brigham and Women's Hospital, Boston, MA, USA

35 Harvard Medical School, Boston, MA, USA

36 Center for Public Health Genomics, Department of Public Health Sciences, University of Virginia, Charlottesville, VA, USA

37 Department of Neurology, University of Maryland School of Medicine and Baltimore VAMC, Baltimore, MD, USA

38 Departments of Medicine, Pediatrics and Population Health Science, University of Mississippi Medical Center, Jackson, MS, USA

39 Institute of Cardiovascular Research, Royal Holloway University of London, UK & Ashford and St Peters Hospital, Surrey UK

40 Department of Psychiatry, The Hope Center Program on Protein Aggregation and Neurodegeneration (HPAN), Washington University, School of Medicine, St. Louis, MO, USA

41 Department of Developmental Biology, Washington University School of Medicine, St. Louis, MO, USA

42 NIHR Blood and Transplant Research Unit in Donor Health and Genomics, Department of Public Health and Primary Care, University of Cambridge, Cambridge, UK

43 Wellcome Trust Sanger Institute, Wellcome Trust Genome Campus, Hinxton, Cambridge, UK

44 British Heart Foundation, Cambridge Centre of Excellence, Department of Medicine, University of Cambridge, Cambridge, UK

45 Department of Medical Genetics, University Medical Center Utrecht, Utrecht, Netherlands

46 Department of Epidemiology, Julius Center for Health Sciences and Primary Care, University Medical Center Utrecht, Utrecht, Netherlands

47 Boston University School of Public Health, Boston, MA, USA

48 Framingham Heart Study, Framingham, MA, USA

49 Department of Immunology, Genetics and Pathology and Science for Life Laboratory, Uppsala University, Uppsala, Sweden

50 Department of Genetics, University of North Carolina, Chapel Hill, NC, USA

51 Department of Neurology and Stroke Center, Basel University Hospital, Switzerland

52 Neurorehabilitation Unit, University and University Center for Medicine of Aging and Rehabilitation Basel, Felix Platter Hospital, Basel, Switzerland

53 Department of Neurology, Yale University School of Medicine, New Haven, CT, USA

54 Program in Medical and Population Genetics, The Broad Institute of Harvard and MIT, Cambridge, MA, USA

55 Department of Neurology, Johns Hopkins University School of Medicine, Baltimore, MD, USA

56 Neuroscience Institute, SF Medical Center, Trenton, NJ, USA

57 Icelandic Heart Association Research Institute, Kopavogur, Iceland

58 University of Iceland, Faculty of Medicine, Reykjavik, Iceland

59 Department of Medical Sciences, Molecular Epidemiology and Science for Life Laboratory, Uppsala University, Uppsala, Sweden

60 Division of Public Health Sciences, Fred Hutchinson Cancer Research Center, Seattle, WA, USA

61 Laboratory of Epidemiology and Population Science, National Institute on Aging, National Institutes of Health, Bethesda, MD, USA

62 Department of Neurology, Leeds General Infirmary, Leeds Teaching Hospitals NHS Trust, Leeds, UK

63 National Institute for Health and Welfare, Helsinki, Finland

64 FIMM - Institute for Molecular Medicine Finland, Helsinki, Finland

65 Department of Epidemiology, University of Washington, Seattle, WA, USA  
66 Public Health Stream, Hunter Medical Research Institute, New Lambton, Australia  
67 Faculty of Health and Medicine, University of Newcastle, Newcastle, Australia  
68 School of Public Health, University of Alabama at Birmingham, Birmingham, AL, USA  
69 Department of Biostatistical Sciences, Wake Forest School of Medicine, Winston-Salem, NC, USA  
70 Aflac Cancer and Blood Disorder Center, Department of Pediatrics, Emory University School of Medicine, Atlanta, GA, USA  
71 Department of Medicine, Division of Cardiovascular Medicine, Stanford University School of Medicine, CA, USA  
72 Department of Medical Sciences, Molecular Epidemiology and Science for Life Laboratory, Uppsala University, Uppsala, Sweden  
73 Epidemiology, School of Public Health, University of Alabama at Birmingham, USA  
74 Brown Foundation Institute of Molecular Medicine, University of Texas Health Science Center at Houston, Houston, TX, USA  
75 Neurovascular Research Group (NEUVAS), Neurology Department, Institut Hospital del Mar d'Investigació Mèdica, Universitat Autònoma de Barcelona, Barcelona, Spain  
76 Department of Pharmacotherapy and Translational Research and Center for Pharmacogenomics, University of Florida, College of Pharmacy, Gainesville, FL, USA  
77 Division of Cardiovascular Medicine, College of Medicine, University of Florida, Gainesville, FL, USA  
78 Department of Cardiology, Leiden University Medical Center, Leiden, the Netherlands  
79 Program in Bioinformatics and Integrative Genomics, Harvard Medical School, Boston, MA, USA  
80 Department of Biology, East Carolina University, Greenville, NC, USA  
81 Center for Health Disparities, East Carolina University, Greenville, NC, USA  
82 University of Cincinnati College of Medicine, Cincinnati, OH, USA  
83 RIKEN Center for Integrative Medical Sciences, Yokohama, Japan  
84 Department of Medicine, University of Colorado Denver, Anschutz Medical Campus, Aurora, CO, USA  
85 Center for Public Health Genomics and Department of Biostatistical Sciences, Wake Forest School of Medicine, Winston-Salem, NC, USA  
86 MRC Epidemiology Unit, University of Cambridge School of Clinical Medicine, Institute of Metabolic Science, Cambridge Biomedical Campus, Cambridge, UK  
87 Intramural Research Program, National Institute on Aging, National Institutes of Health, Bethesda, MD, USA  
88 Department of Neurology, Radiology, and Biomedical Engineering, Washington University School of Medicine, St. Louis, MO, USA  
89 KU Leuven – University of Leuven, Department of Neurosciences, Experimental Neurology, Leuven, Belgium  
90 VIB Center for Brain & Disease Research, University Hospitals Leuven, Department of Neurology, Leuven, Belgium  
91 Univ.-Lille, INSERM U 1171. CHU Lille. Lille, France  
92 Department of Medical and Molecular Genetics, King's College London, London, UK  
93 SGDP Centre, Institute of Psychiatry, Psychology & Neuroscience, King's College London, London, UK



94 Northern Institute for Cancer Research, Paul O'Gorman Building, Newcastle University, Newcastle, UK

95 Department of Clinical Sciences Lund, Neurology, Lund University, Lund, Sweden

96 Department of Neurology and Rehabilitation Medicine, Skåne University Hospital, Lund, Sweden

97 Bioinformatics Core Facility, University of Gothenburg, Gothenburg, Sweden

98 Department of Medical Epidemiology and Biostatistics, Karolinska Institutet, Stockholm, Sweden

99 University of Technology Sydney, Faculty of Health, Ultimo, Australia

100 Department of Medicine, University of Maryland School of Medicine, MD, USA

101 Department of Neurology, Mayo Clinic, Jacksonville, FL, USA

102 Geriatrics Research and Education Clinical Center, Baltimore Veterans Administration Medical Center, Baltimore, MD, USA

103 Division of Geriatrics, School of Medicine, University of Mississippi Medical Center, Jackson, MS, USA

104 Memory Impairment and Neurodegenerative Dementia Center, University of Mississippi Medical Center, Jackson, MS, USA

105 Laboratory of Neurogenetics, National Institute on Aging, National Institutes of Health, Bethesda, MD, USA

106 Data Tecnica International, Glen Echo MD, USA

107 Department of Epidemiology and Public Health, Graduate School of Medical Sciences, Kyushu University, Fukuoka, Japan

108 Clinical Research Facility, Department of Medicine, NUI Galway, Galway, Ireland

109 Cardiovascular Health Research Unit, Department of Medicine, University of Washington, Seattle, WA, USA

110 Department of Epidemiology, University of Washington, Seattle, WA

111 Department of Health Services, University of Washington, Seattle, WA, USA

112 Kaiser Permanente Washington Health Research Institute, Seattle, WA, USA

113 Brain Center Rudolf Magnus, Department of Neurology, University Medical Center Utrecht, Utrecht, The Netherlands

114 Usher Institute of Population Health Sciences and Informatics, University of Edinburgh, Edinburgh, UK

115 Centre for Clinical Brain Sciences, University of Edinburgh, Edinburgh, UK

116 Fred Hutchinson Cancer Research Center, University of Washington, Seattle, WA, USA

117 Department of Medicine, Brigham and Women's Hospital, Boston, MA, USA

118 Department of Biostatistics, University of Washington, Seattle, WA, USA

119 Nuffield Department of Clinical Neurosciences, University of Oxford, UK

120 Institute for Translational Genomics and Population Sciences, Los Angeles Biomedical Research Institute at Harbor-UCLA Medical Center, Torrance, CA, USA

121 Division of Genomic Outcomes, Department of Pediatrics, Harbor-UCLA Medical Center, Torrance, CA, USA

122 Department of Neurology, Miller School of Medicine, University of Miami, Miami, FL, USA

123 Department of Allergy and Rheumatology, Graduate School of Medicine, the University of Tokyo, Tokyo, Japan

124 Center for Public Health Genomics, University of Virginia, Charlottesville, VA, USA

125 Department of Pediatrics, College of Medicine, University of Oklahoma Health Sciences Center, Oklahoma City, OK, USA

126 Department of Neurology, Medical University of Graz, Graz, Austria

127 University Medicine Greifswald, Institute for Community Medicine, SHIP-KEF, Greifswald, Germany

128 University Medicine Greifswald, Department of Neurology, Greifswald, Germany

129 Department of Neurology, Jagiellonian University, Krakow, Poland

130 Department of Neurology, Justus Liebig University, Giessen, Germany

131 Department of Clinical Neurosciences/Neurology, Institute of Neuroscience and Physiology, Sahlgrenska Academy at University of Gothenburg, Gothenburg, Sweden

132 Sahlgrenska University Hospital, Gothenburg, Sweden

133 Stroke Division, Florey Institute of Neuroscience and Mental Health, University of Melbourne, Heidelberg, Australia

134 Austin Health, Department of Neurology, Heidelberg, Australia

135 Department of Internal Medicine, Section Gerontology and Geriatrics, Leiden University Medical Center, Leiden, the Netherlands

136 INSERM U1219, Bordeaux, France

137 Department of Public Health, Bordeaux University Hospital, Bordeaux, France

138 Genetic Epidemiology Unit, Department of Epidemiology, Erasmus University Medical Center Rotterdam, Netherlands

139 Center for Medical Systems Biology, Leiden, Netherlands

140 School of Medicine, Dentistry and Nursing at the University of Glasgow, Glasgow, UK

141 Department of Epidemiology and Population Health, Albert Einstein College of Medicine, NY, USA

142 Department of Physiology and Biophysics, University of Mississippi Medical Center, Jackson, MS, USA

143 A full list of members and affiliations appears in the Supplementary Note

144 Department of Human Genetics, McGill University, Montreal, Canada

145 Department of Pathophysiology, Institute of Biomedicine and Translation Medicine, University of Tartu, Tartu, Estonia

146 Department of Cardiac Surgery, Tartu University Hospital, Tartu, Estonia

147 Clinical Gene Networks AB, Stockholm, Sweden

148 Department of Genetics and Genomic Sciences, The Icahn Institute for Genomics and Multiscale Biology Icahn School of Medicine at Mount Sinai, New York, NY, USA

149 Department of Pathophysiology, Institute of Biomedicine and Translation Medicine, University of Tartu, Biomeedikum, Tartu, Estonia

150 Integrated Cardio Metabolic Centre, Department of Medicine, Karolinska Institutet, Karolinska Universitetssjukhuset, Huddinge, Sweden.

151 Clinical Gene Networks AB, Stockholm, Sweden

152 Sorbonne Universités, UPMC Univ. Paris 06, INSERM, UMR\_S 1166, Team Genomics & Pathophysiology of Cardiovascular Diseases, Paris, France

153 ICAN Institute for Cardiometabolism and Nutrition, Paris, France

154 Department of Biomedical Engineering, University of Virginia, Charlottesville, VA, USA

155 Group Health Research Institute, Group Health Cooperative, Seattle, WA, USA

156 Seattle Epidemiologic Research and Information Center, VA Office of Research and Development, Seattle, WA, USA

157 Cardiovascular Research Center, Massachusetts General Hospital, Boston, MA, USA

158 Department of Medical Research, Bærum Hospital, Vestre Viken Hospital Trust, Gjøttum, Norway

159 Saw Swee Hock School of Public Health, National University of Singapore and National University Health System, Singapore

160 National Heart and Lung Institute, Imperial College London, London, UK  
161 Department of Gene Diagnostics and Therapeutics, Research Institute,  
National Center for Global Health and Medicine, Tokyo, Japan  
162 Department of Epidemiology, Tulane University School of Public Health and  
Tropical Medicine, New Orleans, LA, USA  
163 Department of Cardiology, University Medical Center Groningen, University  
of Groningen, Netherlands  
164 MRC-PHE Centre for Environment and Health, School of Public Health,  
Department of Epidemiology and Biostatistics, Imperial College London, London,  
UK  
165 Department of Epidemiology and Biostatistics, Imperial College London,  
London, UK  
166 Department of Cardiology, Ealing Hospital NHS Trust, Southall, UK  
167 National Heart, Lung and Blood Research Institute, Division of Intramural  
Research, Population Sciences Branch, Framingham, MA, USA  
168 A full list of members and affiliations appears at the end of the manuscript  
169 Department of Pharmaceutical Sciences, College of Pharmacy, University of  
Oklahoma Health Sciences Center, Oklahoma City, OK, USA  
170 Oklahoma Center for Neuroscience, Oklahoma City, OK, USA  
171 Department of Pathology and Genetics, Institute of Biomedicine, The  
Sahlgrenska Academy at University of Gothenburg, Gothenburg, Sweden  
172 Department of Neurology, Helsinki University Hospital, Helsinki, Finland  
173 Clinical Neurosciences, Neurology, University of Helsinki, Helsinki, Finland  
174 Department of Neurology, University of Washington, Seattle, WA, USA  
175 Albrecht Kossel Institute, University Clinic of Rostock, Rostock, Germany  
176 Clinical Trial Service Unit and Epidemiological Studies Unit, Nuffield  
Department of Population Health, University of Oxford, Oxford, UK  
177 Department of Genetics, Perelman School of Medicine, University of  
Pennsylvania, PA, USA  
178 Faculty of Medicine, University of Iceland, Reykjavik, Iceland  
179 Departments of Neurology and Public Health Sciences, University of Virginia  
School of Medicine, Charlottesville, VA, USA  
180 Department of Neurology, Boston University School of Medicine, Boston,  
MA, USA  
181 Human Genetics Center, University of Texas Health Science Center at  
Houston, Houston, TX, USA  
182 Center for Genomic Medicine, Kyoto University Graduate School of  
Medicine, Kyoto, Japan  
183 Munich Cluster for Systems Neurology (SyNergy), Munich, Germany  
184 German Center for Neurodegenerative Diseases (DZNE), Munich, Germany  
185 Boston University School of Medicine, Boston, MA, USA  
186 University of Kentucky College of Public Health, Lexington, KY, USA  
187 University of Newcastle and Hunter Medical Research Institute, New  
Lambton, Australia  
188 Univ. Montpellier, Inserm, U1061, Montpellier, France  
189 Centre for Research in Environmental Epidemiology, Barcelona, Spain  
190 Department of Neurology, Università degli Studi di Perugia, Umbria, Italy  
191 Department of Medicine, University of Maryland School of Medicine,  
Baltimore, MD, USA  
192 Broad Institute, Cambridge, MA, USA  
193 Univ. Bordeaux, Inserm, Bordeaux Population Health Research Center, UMR  
1219, Bordeaux, France  
194 Bordeaux University Hospital, Department of Neurology, Memory Clinic,  
Bordeaux, France

195 Neurovascular Research Laboratory, Vall d'Hebron Institut of Research, Neurology and Medicine Departments-Universitat Autònoma de Barcelona. Vall d'Hebrón Hospital, Barcelona, Spain

196 University Medicine Greifswald, Department of Internal Medicine B, Greifswald, Germany

197 DZHK, Greifswald, Germany

198 Robertson Center for Biostatistics, University of Glasgow, Glasgow, UK

199 Hero DMC Heart Institute, Dayanand Medical College & Hospital, Ludhiana, India

200 Atherosclerosis Research Unit, Department of Medicine Solna, Karolinska Institutet, Stockholm, Sweden

201 Karolinska Institutet, Stockholm, Sweden

202 Division of Emergency Medicine, and Department of Neurology, Washington University School of Medicine, St. Louis, MO, USA

203 Tohoku Medical Megabank Organization, Sendai, Japan

204 Department of Psychiatry, Washington University School of Medicine, St. Louis, MO, USA

205 Department of Public Health and Caring Sciences / Geriatrics, Uppsala University, Uppsala, Sweden

206 Epidemiology and Prevention Group, Center for Public Health Sciences, National Cancer Center, Tokyo, Japan

207 Department of Internal Medicine and the Center for Clinical and Translational Science, The Ohio State University, Columbus, OH, USA

208 Institute of Neuroscience and Physiology, the Sahlgrenska Academy at University of Gothenburg, Goteborg, Sweden

209 Department of Basic and Clinical Neurosciences, King's College London, London, UK

210 Department of Health Care Administration and Management, Graduate School of Medical Sciences, Kyushu University, Japan

211 Department of Medicine and Clinical Science, Graduate School of Medical Sciences, Kyushu University, Japan

212 Landspítali National University Hospital, Departments of Neurology & Radiology, Reykjavik, Iceland

213 Department of Neurology, Heidelberg University Hospital, Germany

214 Department of Neurology, Erasmus University Medical Center

215 Hospital Universitari Mutua Terrassa, Terrassa (Barcelona), Spain

216 Albert Einstein College of Medicine, Montefiore Medical Center, New York, NY, USA

217 John Hunter Hospital, Hunter Medical Research Institute and University of Newcastle, Newcastle, NSW, Australia

218 Centre for Prevention of Stroke and Dementia, Nuffield Department of Clinical Neurosciences, University of Oxford, UK

219 Department of Medical Sciences, Uppsala University, Uppsala, Sweden

220 Genetic and Genomic Epidemiology Unit, Wellcome Trust Centre for Human Genetics, University of Oxford, Oxford, UK

221 The Wellcome Trust Centre for Human Genetics, Oxford, UK

222 Beth Israel Deaconess Medical Center, Boston, MA, USA

223 Wake Forest School of Medicine, Wake Forest, NC, USA

224 Department of Neurology, University of Pittsburgh, Pittsburgh, PA, USA

225 BioBank Japan, Laboratory of Clinical Sequencing, Department of Computational biology and medical Sciences, Graduate school of Frontier Sciences, The University of Tokyo, Tokyo, Japan

226 Neurovascular Research Laboratory, Vall d'Hebron Institut of Research, Neurology and Medicine Departments-Universitat Autònoma de Barcelona. Vall d'Hebrón Hospital, Barcelona, Spain

227 Department of Biostatistics, University of Liverpool, Liverpool, UK  
228 Wellcome Trust Centre for Human Genetics, University of Oxford, Oxford, UK  
229 Institute of Genetic Epidemiology, Helmholtz Zentrum München - German Research Center for Environmental Health, Neuherberg, Germany  
230 Department of Medicine I, Ludwig-Maximilians-Universität, Munich, Germany  
231 DZHK (German Centre for Cardiovascular Research), partner site Munich Heart Alliance, Munich, Germany  
232 Department of Cerebrovascular Diseases, Fondazione IRCCS Istituto Neurologico “Carlo Besta”, Milano, Italy  
233 Karolinska Institutet, MEB, Stockholm, Sweden  
234 University of Tartu, Estonian Genome Center, Tartu, Estonia, Tartu, Estonia  
235 Department of Clinical and Experimental Sciences, Neurology Clinic, University of Brescia, Italy  
236 Translational Genomics Unit, Department of Oncology, IRCCS Istituto di Ricerche Farmacologiche Mario Negri, Milano, Italy  
237 Department of Genetics, Microbiology and Statistics, University of Barcelona, Barcelona, Spain  
238 Psychiatric Genetics Unit, Group of Psychiatry, Mental Health and Addictions, Vall d’Hebron Research Institute (VHIR), Universitat Autònoma de Barcelona, Biomedical Network Research Centre on Mental Health (CIBERSAM), Barcelona, Spain  
239 Department of Neurology, IMIM-Hospital del Mar, and Universitat Autònoma de Barcelona, Spain  
240 IMIM (Hospital del Mar Medical Research Institute), Barcelona, Spain  
241 National Institute for Health Research Comprehensive Biomedical Research Centre, Guy’s & St. Thomas’ NHS Foundation Trust and King’s College London, London, UK  
242 Division of Health and Social Care Research, King’s College London, London, UK  
243 FIMM-Institute for Molecular Medicine Finland, Helsinki, Finland  
244 THL-National Institute for Health and Welfare, Helsinki, Finland  
245 Iwate Tohoku Medical Megabank Organization, Iwate Medical University, Iwate, Japan  
246 BHF Glasgow Cardiovascular Research Centre, Faculty of Medicine, Glasgow, UK  
247 deCODE Genetics/Amgen, Inc., Reykjavik, Iceland  
248 Icelandic Heart Association, Reykjavik, Iceland  
249 Institute of Biomedicine, the Sahlgrenska Academy at University of Gothenburg, Goteborg, Sweden  
250 Department of Epidemiology, University of Maryland School of Medicine, Baltimore, MD, USA  
251 Institute of Cardiovascular and Medical Sciences, Faculty of Medicine, University of Glasgow, Glasgow, UK  
252 Chair of Genetic Epidemiology, IBE, Faculty of Medicine, LMU Munich, Germany  
253 Division of Epidemiology and Prevention, Aichi Cancer Center Research Institute, Nagoya, Japan  
254 Department of Epidemiology, Nagoya University Graduate School of Medicine, Nagoya, Japan  
255 University Medicine Greifswald, Institute for Community Medicine, SHIP-KEF, Greifswald, Germany  
256 Department of Neurology, Caen University Hospital, Caen, France  
257 University of Caen Normandy, Caen, France

258 Department of Internal Medicine, Erasmus University Medical Center,  
Rotterdam, Netherlands

259 Landspítali University Hospital, Reykjavik, Iceland

260 Survey Research Center, University of Michigan, Ann Arbor, MI, USA

261 University of Virginia Department of Neurology, Charlottesville, VA, USA

**Table S1** Dietary questions used in the current analysis

| <b>Questions</b>                                                                                                                                                | <b>Response</b>                                                                                                                                                                                      | <b>Hints</b>                                                                                                                                                                                                                                                                                                                                                          |
|-----------------------------------------------------------------------------------------------------------------------------------------------------------------|------------------------------------------------------------------------------------------------------------------------------------------------------------------------------------------------------|-----------------------------------------------------------------------------------------------------------------------------------------------------------------------------------------------------------------------------------------------------------------------------------------------------------------------------------------------------------------------|
| About how many pieces of FRESH fruit would you eat per DAY? (Count one apple, one banana, 10 grapes etc as one piece; put '0' if you do not eat any)            | Enter INTEGER<br>OR<br>-10: Less than 1<br>OR<br>-1: Do not know<br>OR<br>-3: Prefer not to answer                                                                                                   | Please provide an average considering your intake over the last year. If you are unsure, please provide an estimate or select Do not know.                                                                                                                                                                                                                            |
| On average how many heaped tablespoons of COOKED vegetables would you eat per DAY? (Do not include potatoes; put '0' if you do not eat any)                     | Enter INTEGER<br>OR<br>-10: Less than 1<br>OR<br>-1: Do not know<br>OR<br>-3: Prefer not to answer                                                                                                   | Please provide an average considering your intake over the last year. If you are unsure, please provide an estimate or select Do not know. If you have less than one tablespoon a day select Less than one.                                                                                                                                                           |
| On average how many heaped tablespoons of SALAD or RAW vegetables would you eat per DAY? (Include lettuce, tomato in sandwiches; put '0' if you do not eat any) | Enter INTEGER<br>OR<br>-10: Less than 1<br>OR<br>-1: Do not know<br>OR<br>-3: Prefer not to answer                                                                                                   | Please provide an average considering your intake over the last year. If you are unsure, please provide an estimate or select Do not know. If you have less than one tablespoon a day select Less than one.                                                                                                                                                           |
| How often do you eat oily fish? (e.g. sardines, salmon, mackerel, herring)                                                                                      | SELECT one of 8 from<br>0: Never<br>1: Less than once a week<br>2: Once a week<br>3: 2-4 times a week<br>4: 5-6 times a week<br>5: Once or more daily<br>-1: Do not know<br>-3: Prefer not to answer | Please provide an average considering your intake over the last year. If you are unsure, please provide an estimate or select Do not know. Oily fish include: Salmon, Anchovies, Trout, Swordfish, Mackerel, Bloaters, Herring, Cachas, Sardines, Carp, Pilchards, Hilsa, Kipper, Jack fish, Eel, Katla, Whitebait, Orange roughy, Tuna (fresh only), Pangas, Sprats. |
| How often do you eat other types of fish? (e.g. cod, tinned tuna, haddock)                                                                                      | SELECT one of 8 from<br>0: Never<br>1: Less than once a week<br>2: Once a week<br>3: 2-4 times a week<br>4: 5-6 times a week<br>5: Once or more daily<br>-1: Do not know<br>-3: Prefer not to answer | Please provide an average considering your intake over the last year. If you are unsure, please provide an estimate or select Do not know                                                                                                                                                                                                                             |

|                                                                                                                          |                                                                                                                                                                                                                             |                                                                                                                                                   |
|--------------------------------------------------------------------------------------------------------------------------|-----------------------------------------------------------------------------------------------------------------------------------------------------------------------------------------------------------------------------|---------------------------------------------------------------------------------------------------------------------------------------------------|
| <p>How often do you eat processed meats (such as bacon, ham, sausages, meat pies, kebabs, burgers, chicken nuggets)?</p> | <p>SELECT one of 8 from<br/> 0: Never<br/> 1: Less than once a week<br/> 2: Once a week<br/> 3: 2-4 times a week<br/> 4: 5-6 times a week<br/> 5: Once or more daily<br/> -1: Do not know<br/> -3: Prefer not to answer</p> | <p>Please provide an average considering your intake over the last year. If you are unsure, please provide an estimate or select Do not know.</p> |
| <p>How often do you eat beef? (Do not count processed meats)</p>                                                         | <p>SELECT one of 8 from<br/> 0: Never<br/> 1: Less than once a week<br/> 2: Once a week<br/> 3: 2-4 times a week<br/> 4: 5-6 times a week<br/> 5: Once or more daily<br/> -1: Do not know<br/> -3: Prefer not to answer</p> | <p>Please provide an average considering your intake over the last year. If you are unsure, please provide an estimate or select Do not know.</p> |
| <p>How often do you eat lamb/mutton? (Do not count processed meats)</p>                                                  | <p>SELECT one of 8 from<br/> 0: Never<br/> 1: Less than once a week<br/> 2: Once a week<br/> 3: 2-4 times a week<br/> 4: 5-6 times a week<br/> 5: Once or more daily<br/> -1: Do not know<br/> -3: Prefer not to answer</p> | <p>Please provide an average considering your intake over the last year. If you are unsure, please provide an estimate or select Do not know.</p> |
| <p>How often do you eat pork? (Do not count processed meats such as bacon or ham)</p>                                    | <p>SELECT one of 8 from<br/> 0: Never<br/> 1: Less than once a week<br/> 2: Once a week<br/> 3: 2-4 times a week<br/> 4: 5-6 times a week<br/> 5: Once or more daily<br/> -1: Do not know<br/> -3: Prefer not to answer</p> | <p>Please provide an average considering your intake over the last year. If you are unsure, please provide an estimate or select Do not know.</p> |



**Table S2** UK Biobank data fields used to derive the outcome variables and follow-up duration

| <b>Data field ID</b> | <b>Description</b>                               |
|----------------------|--------------------------------------------------|
| 53                   | Date of attending assessment centre              |
| 40000                | Date of death                                    |
| 42000                | Date of first myocardial infarction              |
| 42001                | Source of first myocardial infarction report     |
| 42006                | Date of first stroke                             |
| 42007                | Source of first stroke report                    |
| 42008                | Date of first ischaemic stroke                   |
| 42009                | Source of first ischaemic stroke report          |
| 42010                | Date of first intracerebral haemorrhage          |
| 42011                | Source of first intracerebral haemorrhage report |
| 42012                | Date of first subarachnoid haemorrhage           |
| 42013                | Source of first subarachnoid haemorrhage report  |

**Table S4** Impact of cardiometabolic risk factors on the association of the genetic risk score with incident stroke

|                              | <b>Model 1</b>                    |                             | <b>Model 2</b>                          |                             |
|------------------------------|-----------------------------------|-----------------------------|-----------------------------------------|-----------------------------|
|                              | (No cardiometabolic risk factors) |                             | (Cardiometabolic risk factors included) |                             |
|                              | <b>HR (95% CI)</b>                | <b>p-value</b>              | <b>HR (95% CI)</b>                      | <b>p-value</b>              |
| <b>Genetic risk category</b> |                                   |                             |                                         |                             |
| <b>High</b>                  | <b>1.35 (1.21-1.50)</b>           | <b>3.9×10<sup>-08</sup></b> | <b>1.36 (1.22-1.53)</b>                 | <b>9.9×10<sup>-08</sup></b> |
| <b>Intermediate</b>          | <b>1.20 (1.08-1.34)</b>           | <b>0.001</b>                | <b>1.22 (1.09-1.38)</b>                 | <b>6.7×10<sup>-04</sup></b> |
| <b>Low</b>                   | <b>1</b>                          |                             | <b>1</b>                                |                             |
| Blood pressure               |                                   |                             |                                         |                             |
| SBP, per 10mmHg              |                                   |                             | 1.08 (1.05-1.12)                        | 1.0×10 <sup>-06</sup>       |
| DBP, per 10mmHg              |                                   |                             | 1.09 (1.03-1.16)                        | 0.004                       |
| Diabetes                     |                                   |                             | 1.93 (1.63-2.29)                        | 3.9×10 <sup>-14</sup>       |
| Lipid lowering medication    |                                   |                             | 1.03 (0.91-1-15)                        | 0.72                        |

**Table S5** Association of genetic risk and lifestyle with incident stroke

|                       | Model 1          |                        | Model 2          |                        | Model 3          |                        |
|-----------------------|------------------|------------------------|------------------|------------------------|------------------|------------------------|
|                       | HR (95% CI)      | p-value                | HR (95% CI)      | p-value                | HR (95% CI)      | p-value                |
| Genetic risk category | 1.35 (1.21-1.50) | $3.90 \times 10^{-08}$ |                  |                        | 1.35 (1.21-1.50) | $3.72 \times 10^{-08}$ |
| High                  | 1.20 (1.08-1.34) | 0.001                  | x                |                        | 1.20 (1.08-1.34) | 0.001                  |
| Intermediate          |                  |                        | x                |                        |                  |                        |
| Low                   | 1                |                        | x                |                        | 1                |                        |
| Lifestyle             |                  |                        |                  |                        |                  |                        |
| Unfavourable          | x                |                        | 1.66 (1.45-1.89) | $1.19 \times 10^{-13}$ | 1.62 (1.42-1.85) | $1.48 \times 10^{-12}$ |
| Intermediate          | x                |                        | 1.27 (1.16-1.40) | $8.59 \times 10^{-07}$ | 1.26 (1.15-1.39) | $1.96 \times 10^{-06}$ |
| Favourable            | x                |                        | 1                |                        | 1                |                        |

Model 1 includes age, sex, first 10 principal components of ancestry, genotyping batch and genetic risk; model 2 includes age, sex and lifestyle profile; model 3 includes all variables of model 1 with the addition of lifestyle profile.

**Table S6** Association of lifestyle with incident stroke in genetic risk strata

|              | Low genetic risk |                        | Intermediate genetic risk |         | High genetic risk |                        |
|--------------|------------------|------------------------|---------------------------|---------|-------------------|------------------------|
|              | HR (95% CI)      | p-value                | HR (95% CI)               | p-value | HR (95% CI)       | p-value                |
| Lifestyle    |                  |                        |                           |         |                   |                        |
| Unfavourable | 1.88 (1.47-2.39) | $3.90 \times 10^{-07}$ | 1.49 (1.17-1.88)          | 0.001   | 1.66 (1.34-2.06)  | $4.12 \times 10^{-06}$ |
| Intermediate | 1.37 (1.15-1.64) | $5.70 \times 10^{-04}$ | 1.28 (1.09-1.51)          | 0.003   | 1.20 (1.02-1.40)  | 0.03                   |
| Favourable   | 1                |                        | 1                         |         | 1                 |                        |

Abbreviations: HR, hazard ratio; CI, confidence interval

Hazard ratios were calculated using Cox proportional hazards models, adjusted for age and sex.

**Table S7** Association of genetic risk with incident stroke and incident ischaemic stroke using Cox proportional hazards regression and incident stroke using competing risk regression (Fine and Gray)

|                       | <b>All-Stroke<br/>HR (95%CI)</b> | <b>p</b>              | <b>Ischaemic stroke<br/>HR (95%CI)</b> | <b>p</b>              | <b>All-Stroke CRR<br/>SHR (95%CI)</b> | <b>p</b>              |
|-----------------------|----------------------------------|-----------------------|----------------------------------------|-----------------------|---------------------------------------|-----------------------|
| Genetic risk category |                                  |                       |                                        |                       |                                       |                       |
| High                  | 1.35 (1.21-1.50)                 | 3.9×10 <sup>-08</sup> | 1.30 (1.16-1.47)                       | 1.8×10 <sup>-05</sup> | 1.35 (1.21-1.50)                      | 4.0×10 <sup>-08</sup> |
| Intermediate          | 1.20 (1.08-1.34)                 | 9.7×10 <sup>-04</sup> | 1.13 (1.00-1.28)                       | 0.06                  | 1.20 (1.08-1.34)                      | 0.001                 |
| Low                   | 1                                |                       | 1                                      |                       | 1                                     |                       |

Abbreviations: HR, hazard ratio; CI, confidence interval; SHR, subdistribution hazard ratio

Hazard ratios were calculated using Cox proportional hazards models. Subdistribution hazard ratio was calculated using proportional subdistribution hazards regression models (Fine and Gray) as implemented in the R-package ‘cmprsk’

All models were adjusted for age, sex, first 10 principal components of ancestry and genotyping batch

**Table S8** Association of lifestyle with incident stroke and incident ischaemic stroke using Cox proportional hazards regression and incident stroke using competing risk regression (Fine and Gray)

|              | <b>All-Stroke<br/>HR (95%CI)</b> | <b>p</b>              | <b>Ischaemic stroke<br/>HR (95%CI)</b> | <b>p</b>              | <b>All-Stroke CRR<br/>SHR (95%CI)</b> | <b>p</b>              |
|--------------|----------------------------------|-----------------------|----------------------------------------|-----------------------|---------------------------------------|-----------------------|
| Lifestyle    |                                  |                       |                                        |                       |                                       |                       |
| Unfavourable | 1.66 (1.45-1.89)                 | 1.2×10 <sup>-13</sup> | 1.72 (1.48-2.00)                       | 1.8×10 <sup>-12</sup> | 1.63 (1.42-1.86)                      | 7.4×10 <sup>-13</sup> |
| Intermediate | 1.27 (1.16-1.40)                 | 8.6×10 <sup>-07</sup> | 1.30 (1.16-1.45)                       | 3.5×10 <sup>-06</sup> | 1.26 (1.15-1.39)                      | 1.9×10 <sup>-06</sup> |
| Favourable   | 1                                |                       | 1                                      |                       | 1                                     |                       |

Abbreviations: HR, hazard ratio; CI, confidence interval; SHR, subdistribution hazard ratio

Hazard ratios were calculated using Cox proportional hazards models. Subdistribution hazard ratio was calculated using proportional subdistribution hazards regression models (Fine and Gray) as implemented in the R-package ‘cmprsk’

All models were adjusted for age and sex

**Table S9** Association of lifestyle and genetic risk score with incident stroke and incident ischaemic stroke using Cox proportional hazards regression and incident stroke using competing risk regression (Fine and Gray)

|       | <b>All-Stroke<br/>HR (95%CI)</b> | <b>p</b>              | <b>Ischaemic stroke<br/>HR (95%CI)</b> | <b>P</b>              | <b>All-Stroke CRR<br/>SHR (95%CI)</b> | <b>p</b>              |
|-------|----------------------------------|-----------------------|----------------------------------------|-----------------------|---------------------------------------|-----------------------|
| HG-UL | 2.30 (1.84-2.87)                 | 3.3×10 <sup>-13</sup> | 2.52 (1.95-3.24)                       | 8.8×10 <sup>-13</sup> | 2.25 (1.80-2.81)                      | 1.4×10 <sup>-12</sup> |
| HG-IL | 1.70 (1.44-2.01)                 | 8.1×10 <sup>-10</sup> | 1.93 (1.59-2.34)                       | 2.0×10 <sup>-11</sup> | 1.68 (1.42-2.00)                      | 1.7×10 <sup>-09</sup> |
| HG-FL | 1.44 (1.25-1.66)                 | 7.0×10 <sup>-07</sup> | 1.36 (1.15-1.61)                       | 4.4×10 <sup>-4</sup>  | 1.44 (1.25-1.66)                      | 7.2×10 <sup>-07</sup> |
| IG-UL | 1.85 (1.46-2.37)                 | 5.4×10 <sup>-07</sup> | 1.62 (1.20-2.19)                       | 0.002                 | 1.82 (1.43-2.32)                      | 1.2×10 <sup>-06</sup> |
| IG-IL | 1.62 (1.37-1.92)                 | 3.2×10 <sup>-08</sup> | 1.36 (1.10-1.68)                       | 0.004                 | 1.60 (1.35-1.90)                      | 6.7×10 <sup>-08</sup> |
| IG-FL | 1.26 (1.09-1.46)                 | 0.002                 | 1.36 (1.15-1.62)                       | 3.9×10 <sup>-4</sup>  | 1.26 (1.09-1.46)                      | 0.002                 |
| LG-UL | 1.84 (1.44-2.35)                 | 8.0×10 <sup>-07</sup> | 2.18 (1.67-2.85)                       | 8.9×10 <sup>-9</sup>  | 1.81 (1.42-2.30)                      | 1.6×10 <sup>-06</sup> |
| LG-IL | 1.36 (1.14-1.63)                 | 7.3×10 <sup>-04</sup> | 1.47 (1.20-1.80)                       | 2.5×10 <sup>-4</sup>  | 1.35 (1.13-1.62)                      | 0.001                 |
| LG-FL | 1                                |                       | 1                                      |                       | 1                                     |                       |

Abbreviations: HR, hazard ratio; CI, confidence interval; SHR, subdistribution hazard ratio; HG, high genetic risk; IG, intermediate genetic risk; LG, low genetic risk; UL, unfavourable lifestyle; IL, intermediate lifestyle; FL, favourable lifestyle

Hazard ratios were calculated using Cox proportional hazards models. Subdistribution hazard ratio was calculated using proportional subdistribution hazards regression models (Fine and Gray) as implemented in the R-package ‘cmprsk’

All models were adjusted for age, sex, first 10 principal components of ancestry and genotyping batch.

**Table S10** Relative and absolute risk of incident stroke according to genetic and lifestyle profiles including double weighting for smoking

|                     |                                               | <b>Lifestyle</b>                              |                                               |                                                |
|---------------------|-----------------------------------------------|-----------------------------------------------|-----------------------------------------------|------------------------------------------------|
| <b>Genetic risk</b> |                                               | <b>Favourable</b>                             | <b>Intermediate</b>                           | <b>Unfavourable</b>                            |
| <b>Low</b>          | Hazard Ratio<br>(95% CI)                      | 1                                             | 1.31<br>(1.09-1.58)<br>p=0.005                | 1.96<br>(1.58-2.44)<br>p=1.3×10 <sup>-9</sup>  |
|                     | 8-year<br>cumulative<br>incidence<br>(95% CI) | 0.53%<br>(0.47%-0.59%)                        | 0.69%<br>(0.58%-0.80%)                        | 1.00%<br>(0.80%-1.20%)                         |
| <b>Intermediate</b> | Hazard Ratio<br>(95% CI)                      | 1.24<br>(1.07-1.45)<br>p=0.005                | 1.52<br>(1.27-1.82)<br>p=4.0×10 <sup>-6</sup> | 2.25<br>(1.83-2.76)<br>p=2.1×10 <sup>-14</sup> |
|                     | 8-year<br>cumulative<br>incidence<br>(95% CI) | 0.66%<br>(0.59%-0.73%)                        | 0.76%<br>(0.65%-0.87%)                        | 1.09%<br>(0.89%-1.28%)                         |
| <b>High</b>         | Hazard Ratio<br>(95% CI)                      | 1.45<br>(1.25-1.68)<br>p=6.7×10 <sup>-7</sup> | 1.62<br>(1.36-1.94)<br>p=6.6×10 <sup>-8</sup> | 2.45<br>(2.00-3.00)<br>p=<2×10 <sup>-16</sup>  |
|                     | 8-year<br>cumulative<br>incidence<br>(95% CI) | 0.78%<br>(0.70%-0.85%)                        | 0.87%<br>(0.74%-1.00%)                        | 1.16%<br>(0.97%-1.36%)                         |

Hazard Ratios were calculated using Cox proportional hazards models, adjusted for age, sex, first 10 principal components of ancestry and genotyping batch. 8-year cumulative incidence was calculated using the cumulative incidence function as implemented in the ‘cmprsk’ R-package.



**Figure S1** Association of genetic risk score at varying significance thresholds with incident stroke

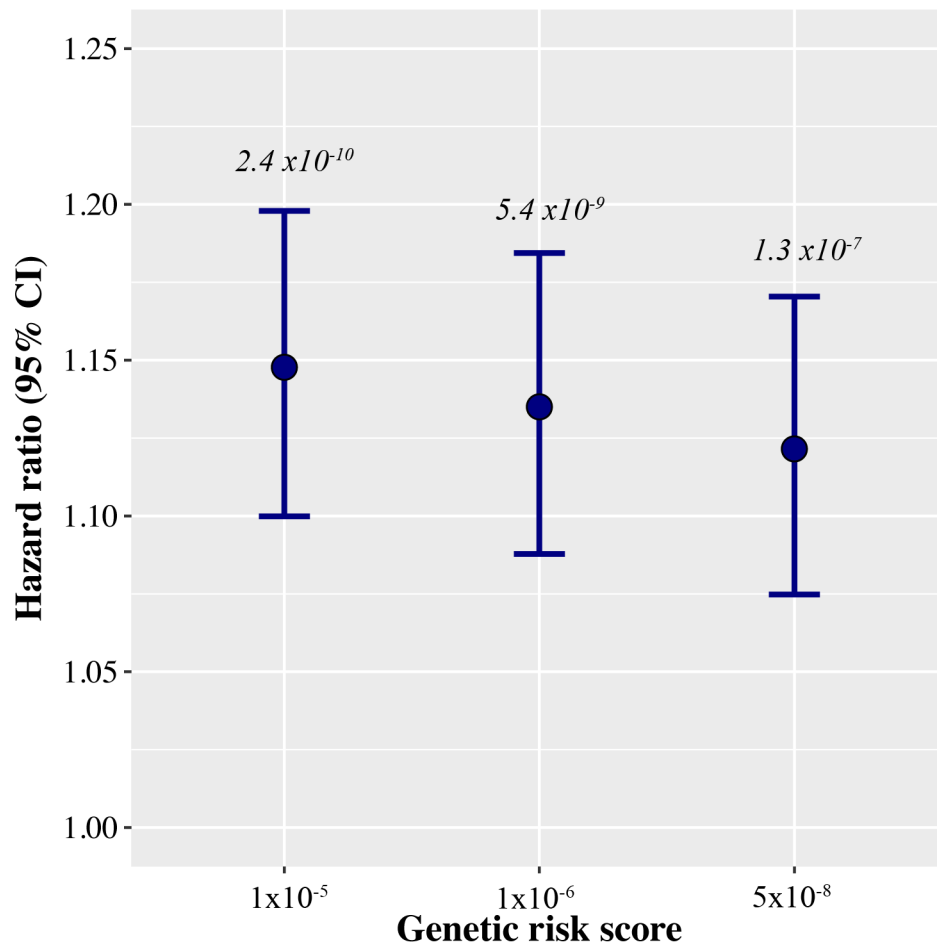

P-values above the bars are the p-values for the association of the specific risk score with incident stroke.

**Figure S2** Distribution of all stroke genetic risk score derived from MEGASTROKE

$p < 1 \times 10^{-5}$

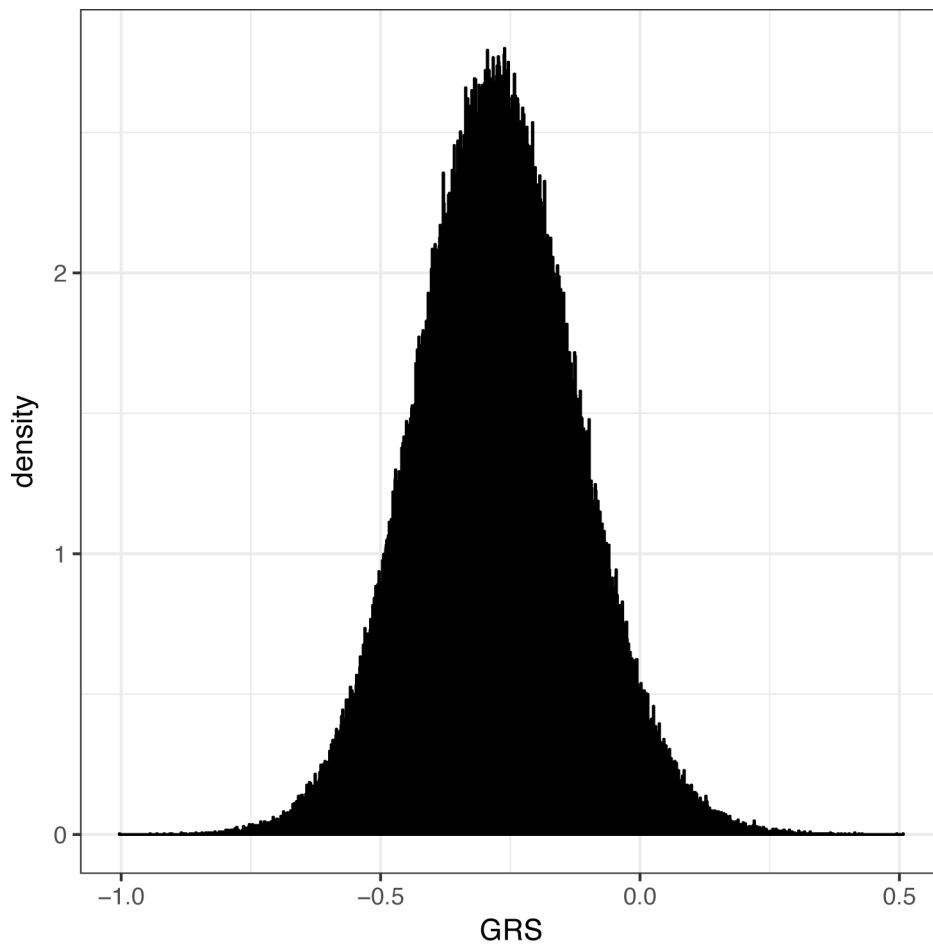

Abbreviations: GRS, genetic risk score

**Figure S3** Distribution of genetic risk across lifestyle categories

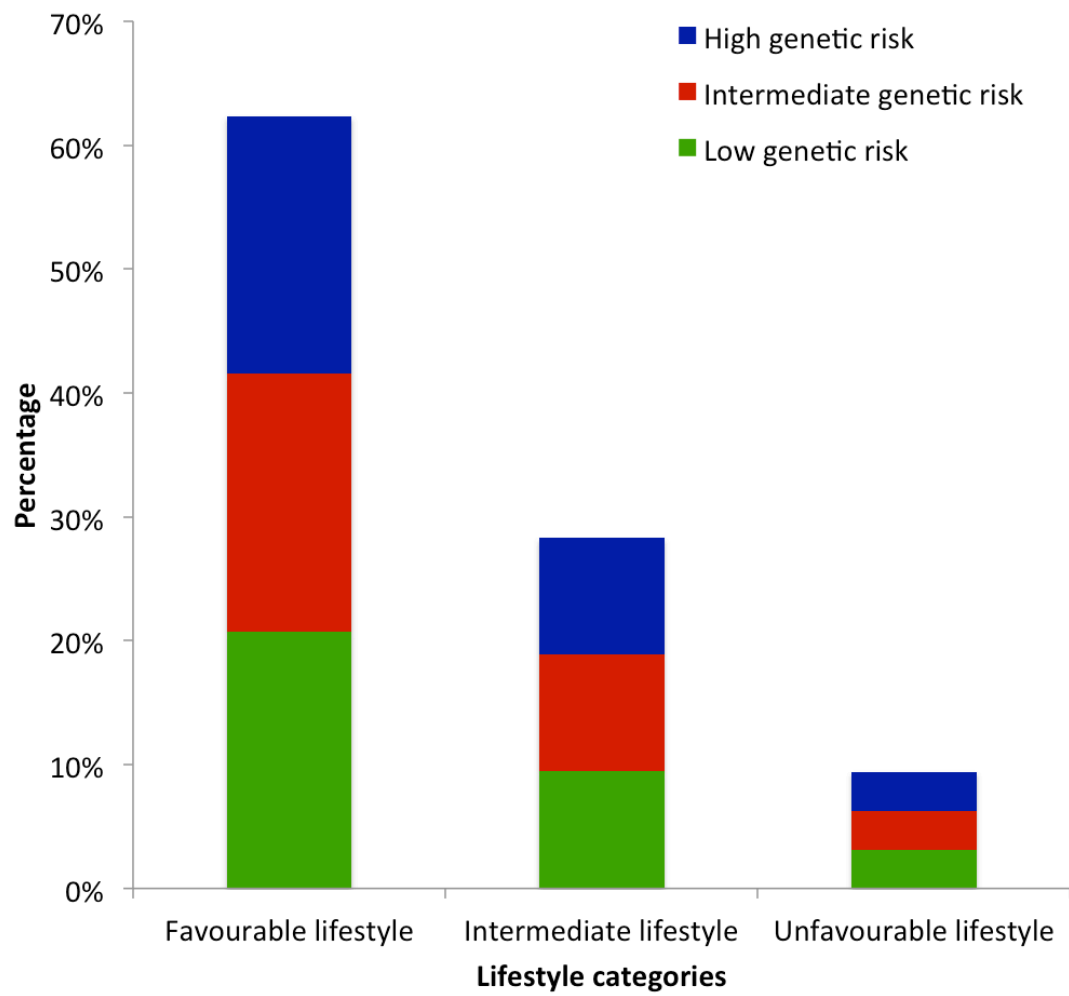

**Figure S4** Standardized risk of incident stroke according to genetic risk and lifestyle

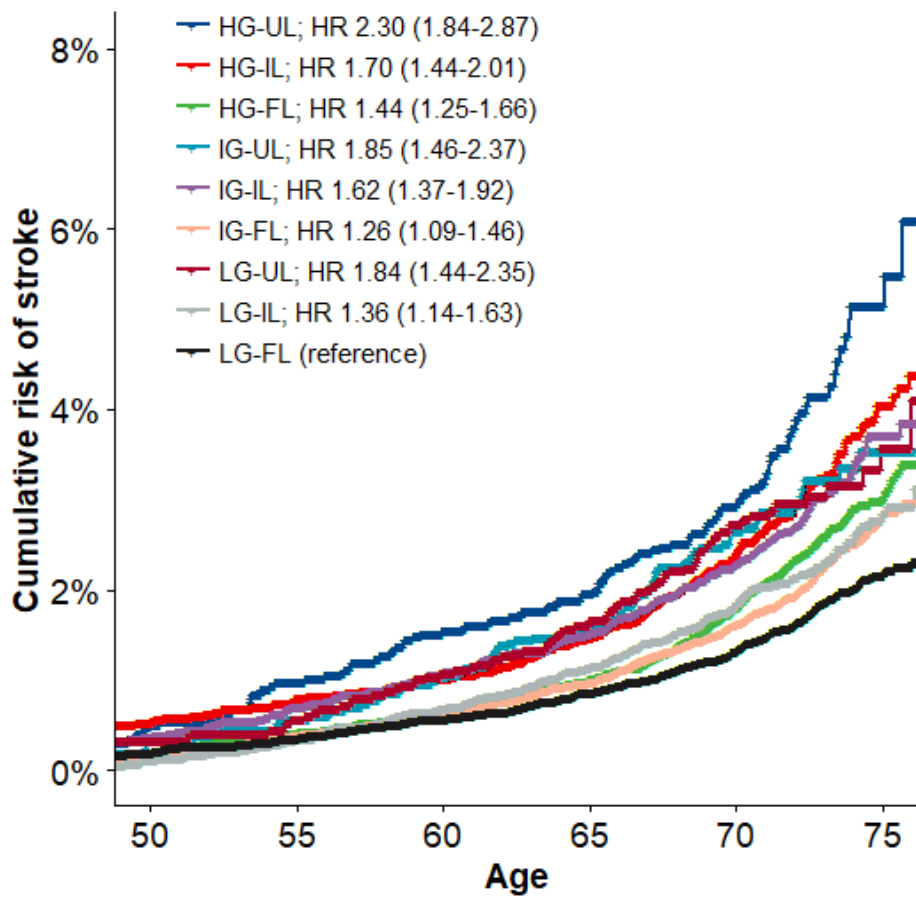

Abbreviations: HG, high genetic risk; IG, intermediate genetic risk; LG, low genetic risk; UL, unfavourable lifestyle; IL, intermediate lifestyle; FL, favourable lifestyle

**Figure S5** Standardized risk of incident stroke according to genetic risk stratified by sex

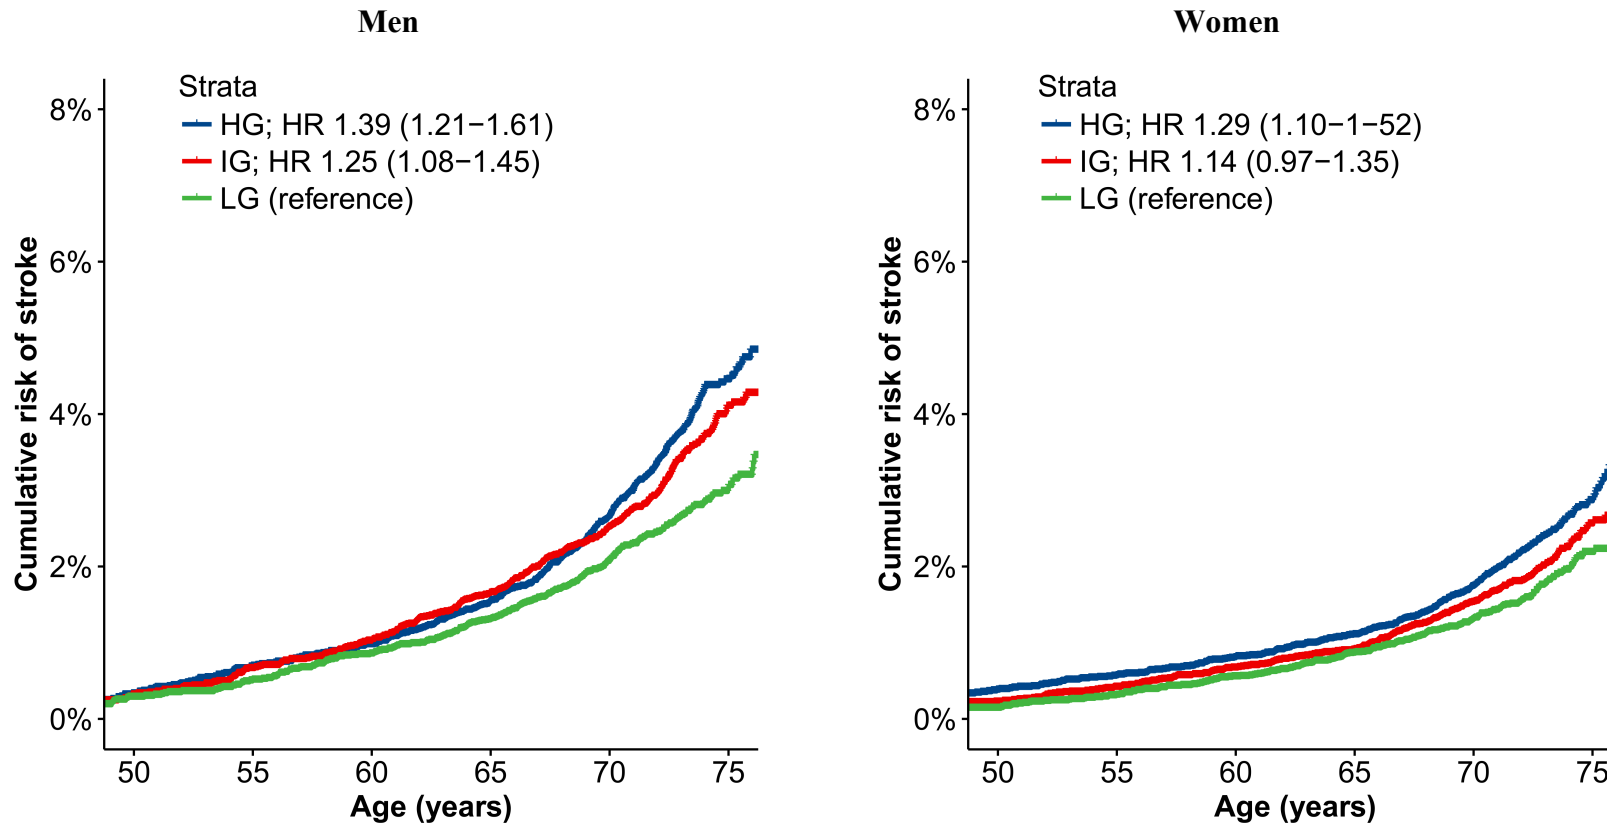

Abbreviations: HG, high genetic risk; IG, intermediate genetic risk; LG, low genetic risk

**Figure S6** Standardized risk of incident stroke according to lifestyle profile stratified by sex

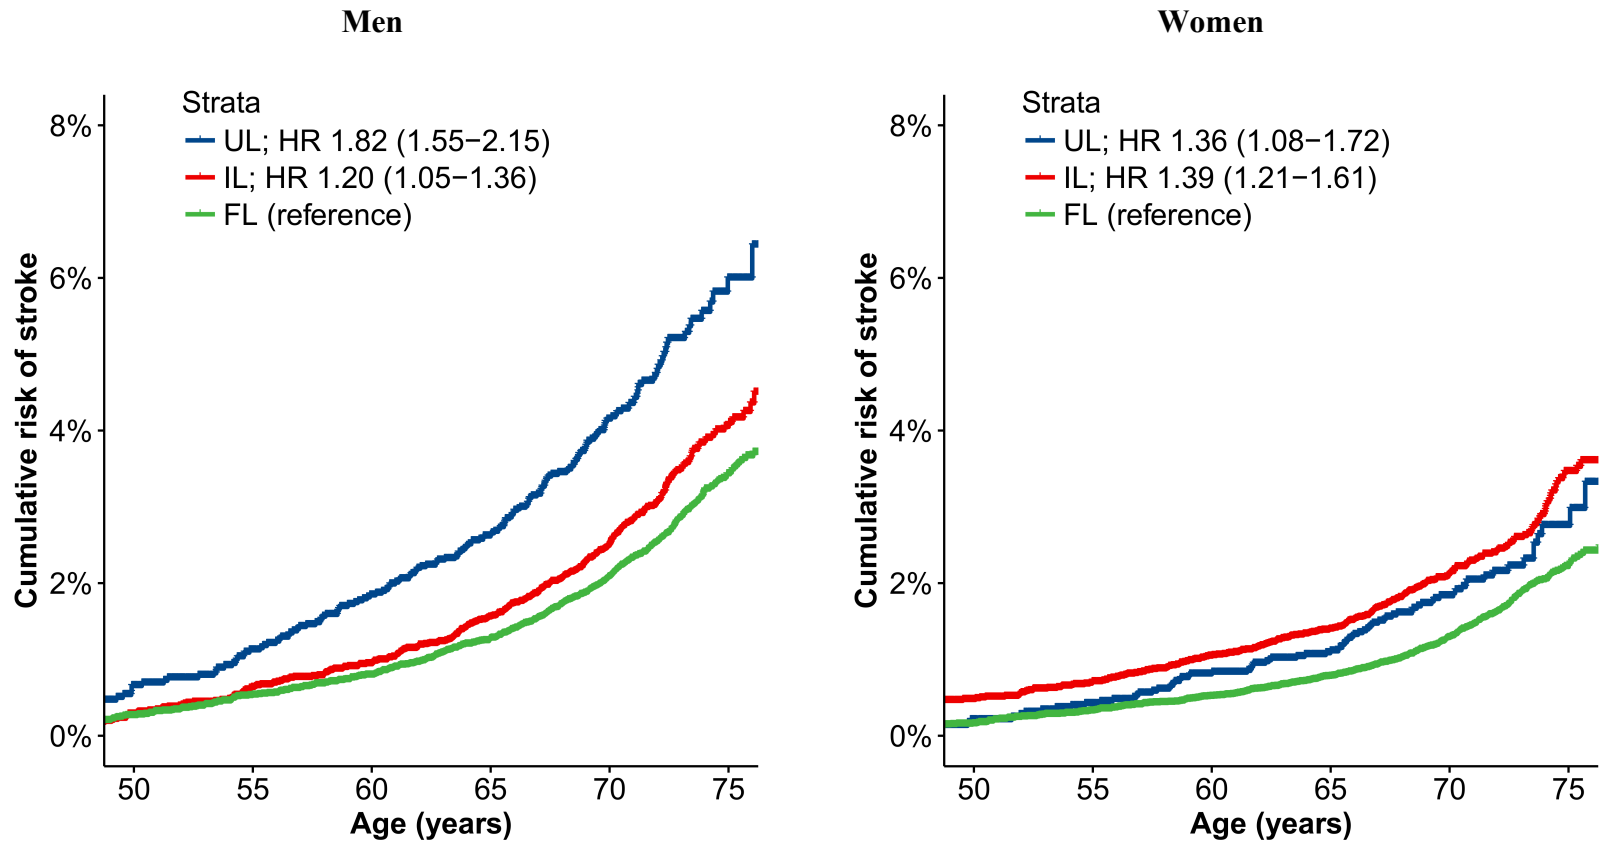

Abbreviations: UL, unfavourable lifestyle; IL, intermediate lifestyle; FL, favourable lifestyle

## Supplemental References

1. Benjamin EJ, Blaha MJ, Chiuve SE, et al. Heart Disease and Stroke Statistics-2017 Update: A Report From the American Heart Association. *Circulation* 2017;135(10):e146-e603. doi: 10.1161/CIR.0000000000000485
2. Malik R, Chauhan G, Traylor M, et al. Multi-ancestry genome-wide association study of 520,000 subjects identifies 32 loci associated with stroke and stroke subtypes. *Nat Genet.* 2018 Apr;50(4):524-537. 10.1038/s41588-018-0058-3
